# Supplementary material
Source: PubMed Central journal article supplement (PMC9296514)

Supplemental Table S2. Sensitivity analysis for the MR analyses of genetically predicted telomere length on pediatric germ cell tumor

a. Codd et al. 7 SNPs MR Analysis

| SNP                                          | Gene          | rsID       | beta (b) | standard error (se) | OR (95% CI)        | pval   |
|----------------------------------------------|---------------|------------|----------|---------------------|--------------------|--------|
| chr2:54248729:c:a                            | <i>TERT</i>   | rs11125529 | 0.375    | 1.432               | 1.45 (0.09, 24.09) | 0.793  |
| chr3:169774313:c:t                           | <i>OBFC1</i>  | rs10936599 | 1.423    | 0.602               | 4.15 (1.28, 13.50) | 0.018  |
| chr4:163086668:a:g                           | <i>ACYP2</i>  | rs7675998  | 0.753    | 0.893               | 2.12 (0.37, 12.22) | 0.399  |
| chr5:1286401:c:a                             | <i>ZNF208</i> | rs2736100  | -2.533   | 0.694               | 0.08 (0.02, 0.31)  | 0.0003 |
| chr10:103916707:c:a                          | <i>NAF1</i>   | rs9420907  | -0.484   | 1.116               | 0.62 (0.07, 5.49)  | 0.664  |
| chr19:22032639:a:g                           | <i>RTEL1</i>  | rs8105767  | 0.648    | 1.171               | 1.91 (0.19, 18.98) | 0.580  |
| chr20:63790269:a:g                           | <i>TERC</i>   | rs755017   | 1.274    | 1.156               | 3.58 (0.37, 34.46) | 0.271  |
| <b>All - MR Egger</b>                        |               |            | 0.506    | 3.125               | 1.66 (0, 758.24)   | 0.878  |
| <b>All - Weighted median</b>                 |               |            | 0.732    | 0.499               | 2.08 (0.78, 5.53)  | 0.143  |
| <b>All - Inverse variance weighted (IVW)</b> |               |            | 0.093    | 0.634               | 1.10 (0.32, 3.80)  | 0.884  |

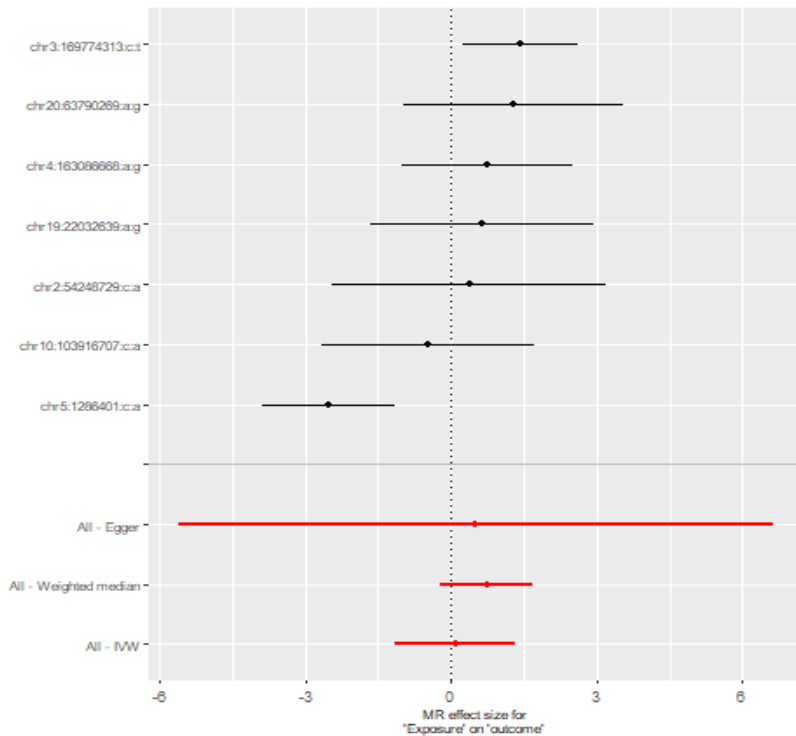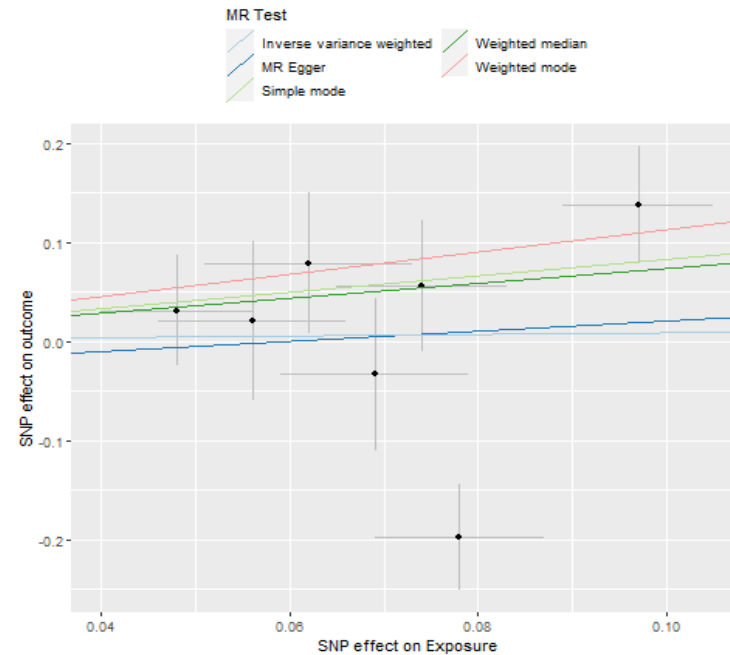

**Supplemental Table S2. Sensitivity analysis for the MR analyses of genetically predicted telomere length on pediatric germ cell tumor**

**Test for directional pleiotropy**

|                                        | <b>intercept</b> | <b>se</b> | <b>pval</b> |
|----------------------------------------|------------------|-----------|-------------|
| MR Egger regression (test pleiotropy): | -0.031           | 0.226     | 0.897       |

\*non-zero intercept suggests pleiotropy within this set of SNPs (although not significant)

**Test heterogeneity using Cochran's Q-statistic**

| method   | <b>Q</b> | <b>Q_df</b> | <b>Q_pval</b> |
|----------|----------|-------------|---------------|
| MR Egger | 21.26    | 16          | 0.001         |
| IVW      | 21.34    | 17          | 0.002         |

\*significant p-value indicates heterogeneity and possible outliers (could also violate our MR assumption)

**Leave one out analysis - removes one variant and re-estimate causal effect using inverse variance weighted (IVW) method**

| <b>SNP</b>          | <b>Gene</b>   | <b>rsID</b> | <b>b</b> | <b>se</b> | <b>OR (95% CI)</b> | <b>pval</b> |
|---------------------|---------------|-------------|----------|-----------|--------------------|-------------|
| chr5:1286401:c:a    | <i>ZNF208</i> | rs2736100   | 0.898    | 0.384     | 2.45 (1.16, 5.21)  | 0.019       |
| chr10:103916707:c:a | <i>NAF1</i>   | rs9420907   | 0.150    | 0.723     | 1.16 (0.28, 4.79)  | 0.835       |
| chr2:54248729:c:a   | <i>TERT</i>   | rs11125529  | 0.076    | 0.713     | 1.08 (0.27, 4.36)  | 0.915       |
| chr19:22032639:a:g  | <i>RTEL1</i>  | rs8105767   | 0.043    | 0.720     | 1.04 (0.25, 4.28)  | 0.952       |
| chr4:163086668:a:g  | <i>ACYP2</i>  | rs7675998   | -0.016   | 0.738     | 0.98 (0.23, 4.18)  | 0.983       |
| chr20:63790269:a:g  | <i>TERC</i>   | rs755017    | -0.016   | 0.706     | 0.98 (0.25, 3.93)  | 0.982       |
| chr3:169774313:c:t  | <i>OBFC1</i>  | rs10936599  | -0.509   | 0.684     | 0.60 (0.16, 2.30)  | 0.457       |
| All - IVW           |               |             | 0.093    | 0.634     | 1.10 (0.32, 3.80)  | 0.884       |

Supplemental Table S2. Sensitivity analysis for the MR analyses of genetically predicted telomere length on pediatric germ cell tumor

Leave one out analysis - Codd et al 7 SNPs

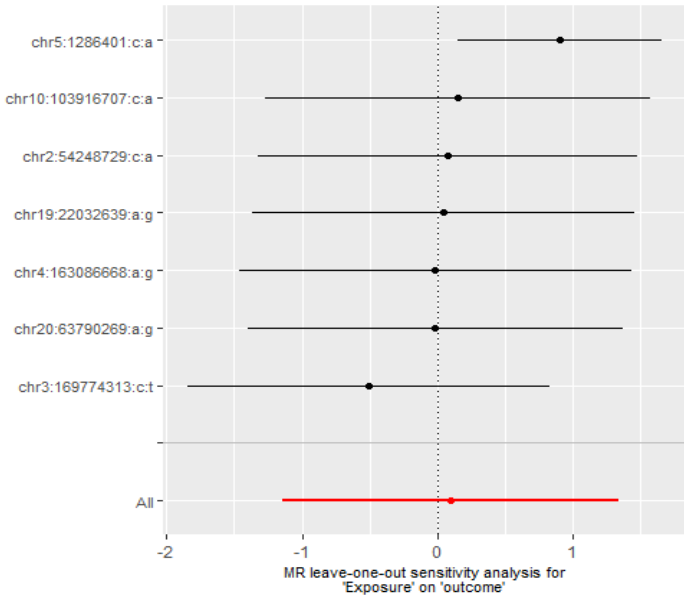

**Supplemental Table S2. Sensitivity analysis for the MR analyses of genetically predicted telomere length on pediatric germ cell tumor**

**Radial MR for Codd et al 7 SNPs**

**IVW model**

|                  | Estimate | Std.Error | Pr(> t ) |
|------------------|----------|-----------|----------|
| Effect (Mod.2nd) | 0.093    | 0.634     | 0.884    |
| Iterative        | 0.093    | 0.634     | 0.884    |
| Exact (FE)       | 0.099    | 0.336     | 0.769    |
| Exact (RE)       | 0.094    | 0.728     | 0.901    |

**Residual standard error:** 1.886 on 6 degrees of freedom

**F-statistic:** 0.02 on 1 and 6 DF, p-value: 0.888

**Q-Statistic for heterogeneity:** 21.33078 on 6 DF , p-value: 0.001599665

**Outliers detected**

|                  | rsID      | Q-statistic | pval   |
|------------------|-----------|-------------|--------|
| chr5:1286401:c:a | rs2736100 | 14.333      | 0.0002 |

**MR Egger model**

|             | Estimate | Std. Error | Pr(> t ) |
|-------------|----------|------------|----------|
| (Intercept) | 0.565    | 2.673      | 0.841    |
| Wj          | -0.388   | 2.380      | 0.877    |

**Q-Statistic for heterogeneity:** 21.06458 on 5 DF , p-value: 0.00178624

**Outliers detected**

| SNP              | rsID      | Q-statistic | pval   |
|------------------|-----------|-------------|--------|
| chr5:1286401:c:a | rs2736100 | 13.334      | 0.0003 |

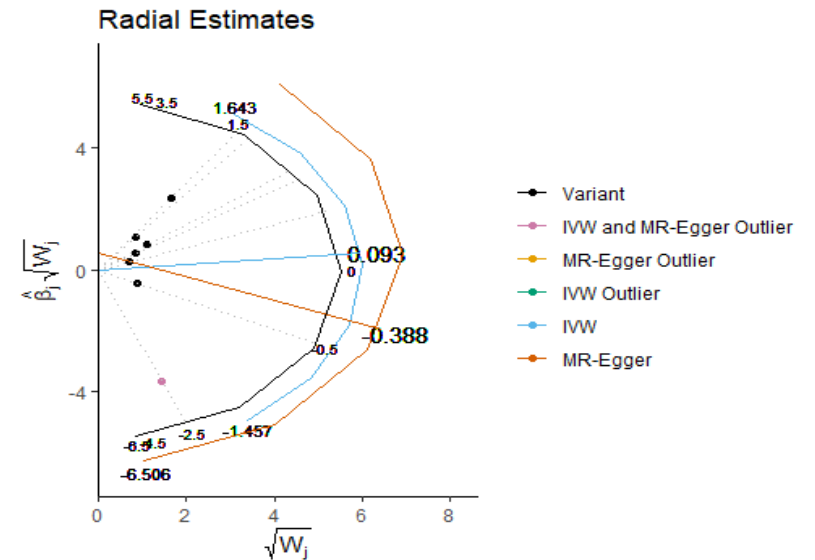

Pink dot indicates chr5:1286401:c:a (*TERT*/rs2736100) is the most influential variant in the IVW and MR Egger

**Supplemental Table S2. Sensitivity analysis for the MR analyses of genetically predicted telomere length on pediatric germ cell tumor**

***\*Remove TERT/rs2736100 SNP (chr5:1286401:c:a) from Codd et al predictor and re-test for heterogeneity using Cochran's Q-statistic***

**\*Codd et al 6 SNPs removing TERT**

**Test for directional pleiotropy**

|                                        | <b>intercept</b> | <b>se</b> | <b>pval</b> |
|----------------------------------------|------------------|-----------|-------------|
| MR Egger regression (test pleiotropy): | -0.090           | 0.110     | 0.458       |

**Test heterogeneity using Cochran's Q-statistic**

| method   | <b>Q</b> | <b>Q_df</b> | <b>Q_pval</b> |
|----------|----------|-------------|---------------|
| MR Egger | 1.93     | 4           | 0.748         |
| IVW      | 2.60     | 5           | 0.761         |

\*non-significant p-value suggests no heterogeneity or outliers in the modified instrument

**Supplemental Table S2. Sensitivity analysis for the MR analyses of genetically predicted telomere length on pediatric germ cell tumor**

**Leave one out analysis - removes one variant and re-estimate causal effect using inverse variance weighted (IVW) method**

| SNP                 | Gene         | rsID       | b     | se    | OR (95% CI)       | pval  |
|---------------------|--------------|------------|-------|-------|-------------------|-------|
| chr10:103916707:c:a | <i>NAF1</i>  | rs9420907  | 1.084 | 0.409 | 2.96 (1.33, 6.59) | 0.008 |
| chr2:54248729:c:a   | <i>TERT</i>  | rs11125529 | 0.938 | 0.399 | 2.56 (1.17, 5.58) | 0.019 |
| chr4:163086668:a:g  | <i>ACYP2</i> | rs7675998  | 0.931 | 0.425 | 2.54 (1.10, 5.84) | 0.029 |
| chr19:22032639:a:g  | <i>RTEL1</i> | rs8105767  | 0.928 | 0.407 | 2.53 (1.14, 5.61) | 0.022 |
| chr20:63790269:a:g  | <i>TERC</i>  | rs755017   | 0.851 | 0.407 | 2.34 (1.05, 5.20) | 0.037 |
| chr3:169774313:c:t  | <i>OBFC1</i> | rs10936599 | 0.538 | 0.499 | 1.71 (0.64, 4.55) | 0.281 |
| All - IVW           |              |            | 0.898 | 0.384 | 2.45 (1.16, 5.21) | 0.019 |

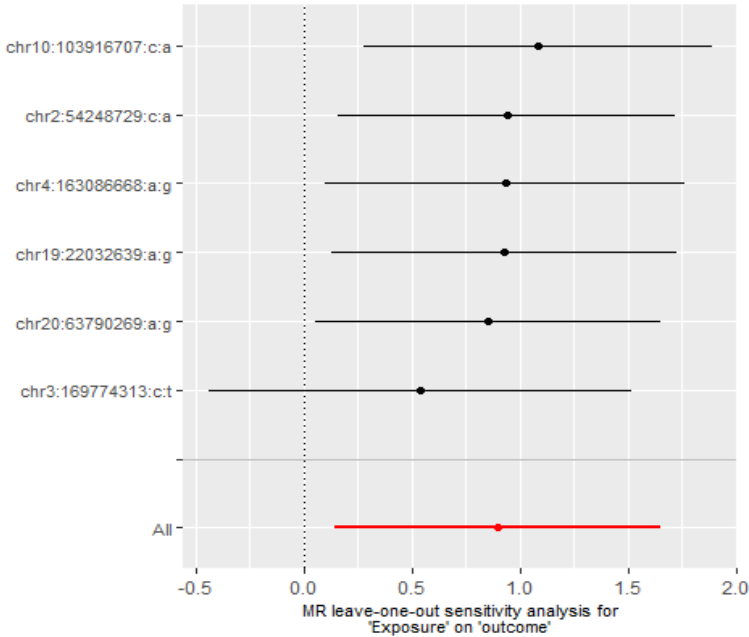

Supplemental Table S2. Sensitivity analysis for the MR analyses of genetically predicted telomere length on pediatric germ cell tumor

Radial MR for Codd et al SNPs removing *TERT*

Radial IVW

|                  | Estimate | Std.Error | Pr(> t ) |
|------------------|----------|-----------|----------|
| Effect (Mod.2nd) | 0.897    | 0.277     | 0.001    |
| Iterative        | 0.897    | 0.277     | 0.001    |
| Exact (FE)       | 0.903    | 0.387     | 0.020    |
| Exact (RE)       | 0.903    | 0.298     | 0.029    |

Residual standard error: 0.717 on 5 degrees of freedom

F-statistic: 10.47 on 1 and 5 DF, p-value: 0.023

Q-Statistic for heterogeneity: 2.567886 on 5 DF , p-value: 0.7662384

No significant outliers

Radial MR-Egger

|             | Estimate | Std. Error | Pr(> t ) |
|-------------|----------|------------|----------|
| (Intercept) | -1.419   | 0.799      | 0.150    |
| Wj          | 2.230    | 0.787      | 0.047    |

Residual standard error: 0.578 on 4 degrees of freedom

F-statistic: 8.03 on 1 and 4 DF, p-value: 0.0472

Q-Statistic for heterogeneity: 1.337641 on 4 DF , p-value: 0.9310112

No significant outliers

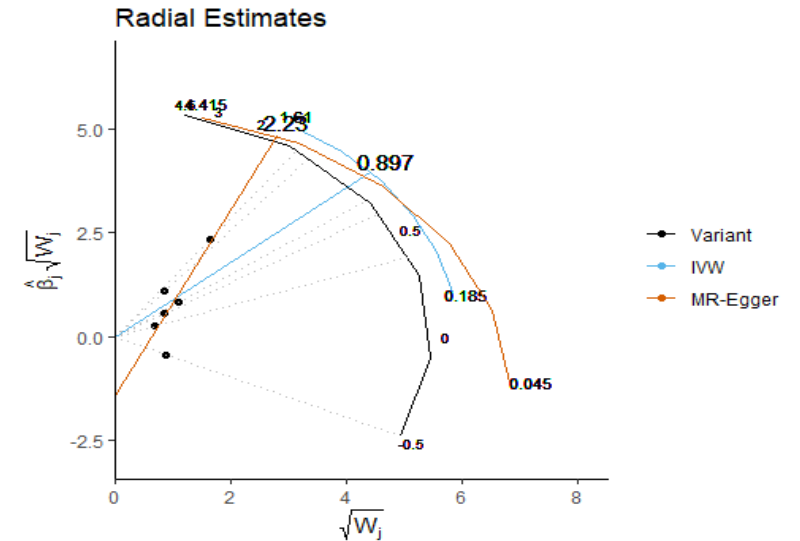

**Supplemental Table S2. Sensitivity analysis for the MR analyses of genetically predicted telomere length on pediatric germ cell tumor**

**b. Li et al. 20 SNPs MR Analysis**

| <b>SNP</b>                             | <b>Gene</b>         | <b>rsID</b> | <b>b</b>      | <b>se</b>    | <b>OR (95% CI)</b>        | <b>pval</b>  |
|----------------------------------------|---------------------|-------------|---------------|--------------|---------------------------|--------------|
| chr1:226374920:a:c                     | <i>PARP1</i>        | rs3219104   | -3.421        | 1.517        | 0.03 (0.00, 0.64)         | 0.024        |
| chr3:101513249:c:a                     | <i>SENP7</i>        | rs55749605  | 1.546         | 1.592        | 4.69 (0.21, 106.31)       | 0.331        |
| chr3:169796797:a:t                     | <i>TERC</i>         | rs10936600  | 1.585         | 0.685        | 4.88 (1.27, 18.68)        | 0.021        |
| chr4:70908630:t:c                      | <i>MOB1B</i>        | rs13137667  | -1.209        | 1.855        | 0.30 (0.01, 11.32)        | 0.514        |
| chr4:163127047:g:c                     | <i>NAF1</i>         | rs4691895   | 0.272         | 1.103        | 1.31 (0.15, 11.40)        | 0.805        |
| chr5:1285859:c:a                       | <i>TERT</i>         | rs7705526   | -2.128        | 0.874        | 0.12 (0.02, 0.66)         | 0.015        |
| chr5:1287079:g:a                       | <i>TERT</i>         | rs2853677   | -3.45         | 0.978        | 0.03 (0.00, 0.22)         | 0.0004       |
| chr6:25480100:t:g                      | <i>CARMIL1</i>      | rs34991172  | -3.879        | 2.433        | 0.02 (0.00, 2.43)         | 0.111        |
| chr6:31619784:g:c                      | <i>PRRC2A</i>       | rs2736176   | -2.9          | 1.669        | 0.06 (0.00, 1.45)         | 0.082        |
| chr7:124914213:c:a                     | <i>POT1</i>         | rs59294613  | 2.527         | 1.517        | 12.52 (0.64, 244.77)      | 0.096        |
| chr10:103916188:t:c                    | <i>STN1/OBFC1</i>   | rs9419958   | -0.292        | 1.206        | 0.75 (0.07, 7.94)         | 0.809        |
| chr11:108234866:g:a                    | <i>ATM</i>          | rs228595    | -2.331        | 1.841        | 0.10 (0.00, 3.59)         | 0.206        |
| chr14:72938044:g:c                     | <i>DCAF4</i>        | rs2302588   | 2.906         | 1.906        | 18.28 (0.44, 766.44)      | 0.127        |
| chr16:69373083:a:g                     | <i>TERF2</i>        | rs3785074   | -2.146        | 1.809        | 0.12 (0.00, 4.05)         | 0.235        |
| chr16:74646176:a:g                     | <i>RFWD3</i>        | rs62053580  | 1.644         | 2.138        | 5.18 (0.08, 341.89)       | 0.442        |
| chr16:82166375:c:t                     | <i>MPHOSPH6</i>     | rs7194734   | -3.719        | 1.835        | 0.02 (0.00, 0.88)         | 0.043        |
| chr19:22032639:a:g                     | <i>ZNF208</i>       | rs8105767   | 0.838         | 1.441        | 2.31 (0.14, 38.95)        | 0.561        |
| chr20:63638397:c:t                     | <i>RTEL1/STMN3</i>  | rs75691080  | 0.809         | 1.612        | 2.25 (0.10, 52.91)        | 0.616        |
| chr20:63660246:c:g                     | <i>RTEL1</i>        | rs34978822  | 1.787         | 1.902        | 5.97 (0.14, 248.37)       | 0.347        |
| chr20:63805045:t:c                     | <i>RTEL1/ZBTB46</i> | rs73624724  | 1.255         | 1.427        | 3.51 (0.21, 57.51)        | 0.379        |
| <b>All - MR Egger</b>                  |                     |             | <b>0.631</b>  | <b>1.425</b> | <b>1.88 (0.12, 30.69)</b> | <b>0.664</b> |
| <b>All - Weighted median</b>           |                     |             | <b>0.296</b>  | <b>0.555</b> | <b>1.34 (0.45, 3.99)</b>  | <b>0.594</b> |
| <b>All - Inverse variance weighted</b> |                     |             | <b>-0.385</b> | <b>0.483</b> | <b>0.68 (0.26, 1.75)</b>  | <b>0.425</b> |



Supplemental Table S2. Sensitivity analysis for the MR analyses of genetically predicted telomere length on pediatric germ cell tumor

Li et al. 20 SNPs MR Analysis

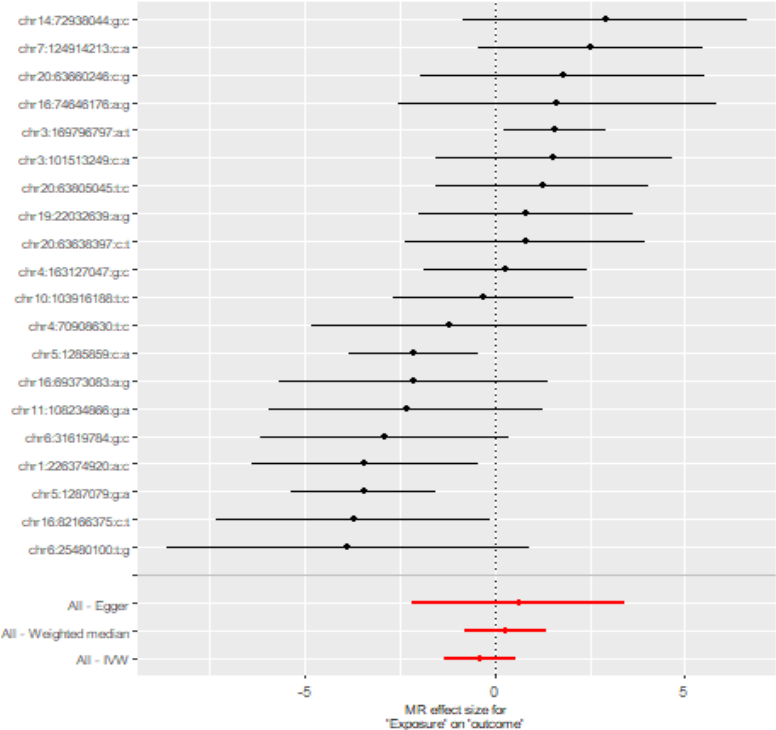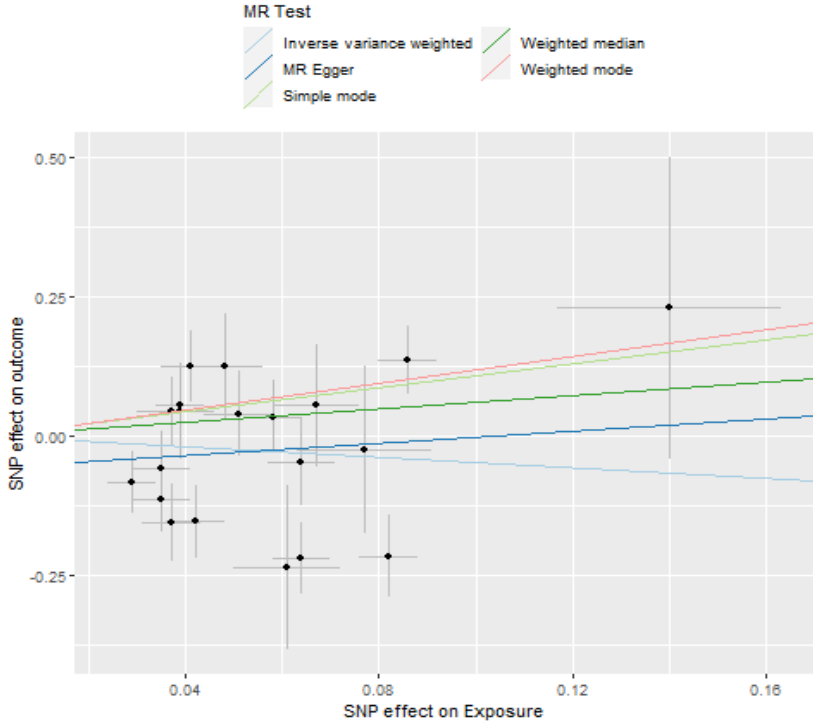

**Supplemental Table S2. Sensitivity analysis for the MR analyses of genetically predicted telomere length on pediatric germ cell tumor**

**Test for directional pleiotropy - Li et al 20 SNPs**

|                                        | <b>intercept</b> | <b>se</b> | <b>pval</b> |
|----------------------------------------|------------------|-----------|-------------|
| MR Egger regression (test pleiotropy): | -0.057           | 0.075     | 0.458       |

\*The (small) MR Egger intercept close to zero/non-significant indicates no horizontal pleiotropy within set of SNPs

**Test heterogeneity using Cochran's Q-statistic**

| method   | <b>Q</b> | <b>Q_df</b> | <b>Q_pval</b> |
|----------|----------|-------------|---------------|
| MR Egger | 47.734   | 18          | 0.00016       |
| IVW      | 49.261   | 19          | 0.00017       |

**Leave one out analysis - removes one variant and re-estimate causal effect using inverse variance weighted (IVW) method**

| <b>SNP</b>          | <b>Gene</b>         | <b>rsID</b> | <b>b</b> | <b>se</b> | <b>OR (95% CI)</b> | <b>pval</b> |
|---------------------|---------------------|-------------|----------|-----------|--------------------|-------------|
| chr5:1287079:g:a    | <i>TERT</i>         | rs2853677   | -0.067   | 0.461     | 0.94 (0.38, 2.31)  | 0.884       |
| chr5:1285859:c:a    | <i>TERT</i>         | rs7705526   | -0.153   | 0.504     | 0.86 (0.32, 2.30)  | 0.762       |
| chr1:226374920:a:c  | <i>PARP1</i>        | rs3219104   | -0.262   | 0.485     | 0.77 (0.30, 1.99)  | 0.589       |
| chr16:82166375:c:t  | <i>MPHOSPH6</i>     | rs7194734   | -0.294   | 0.486     | 0.75 (0.29, 1.93)  | 0.545       |
| chr6:31619784:g:c   | <i>PRRC2A</i>       | rs2736176   | -0.301   | 0.493     | 0.74 (0.28, 1.94)  | 0.541       |
| chr6:25480100:t:g   | <i>CARMIL1</i>      | rs34991172  | -0.331   | 0.490     | 0.72 (0.27, 1.87)  | 0.498       |
| chr11:108234866:g:a | <i>ATM</i>          | rs228595    | -0.332   | 0.497     | 0.72 (0.27, 1.90)  | 0.504       |
| chr16:69373083:a:g  | <i>TERF2</i>        | rs3785074   | -0.336   | 0.498     | 0.71 (0.27, 1.90)  | 0.501       |
| chr4:70908630:t:c   | <i>MOB1B</i>        | rs13137667  | -0.363   | 0.502     | 0.70 (0.26, 1.86)  | 0.469       |
| chr10:103916188:t:c | <i>STN1/OBFC1</i>   | rs9419958   | -0.392   | 0.513     | 0.68 (0.25, 1.85)  | 0.445       |
| chr16:74646176:a:g  | <i>RFWD3</i>        | rs62053580  | -0.426   | 0.497     | 0.65 (0.25, 1.73)  | 0.391       |
| chr20:63638397:c:t  | <i>RTEL1/STMN3</i>  | rs75691080  | -0.428   | 0.502     | 0.65 (0.24, 1.74)  | 0.394       |
| chr4:163127047:g:c  | <i>NAF1</i>         | rs4691895   | -0.438   | 0.514     | 0.65 (0.24, 1.77)  | 0.394       |
| chr20:63660246:c:g  | <i>RTEL1</i>        | rs34978822  | -0.441   | 0.496     | 0.64 (0.24, 1.70)  | 0.374       |
| chr19:22032639:a:g  | <i>ZNF208</i>       | rs8105767   | -0.441   | 0.504     | 0.64 (0.24, 1.73)  | 0.381       |
| chr3:101513249:c:a  | <i>SENP7</i>        | rs55749605  | -0.457   | 0.498     | 0.63 (0.24, 1.68)  | 0.359       |
| chr20:63805045:t:c  | <i>RTEL1/ZBTB46</i> | rs73624724  | -0.461   | 0.501     | 0.63 (0.24, 1.68)  | 0.357       |
| chr14:72938044:g:c  | <i>DCAF4</i>        | rs2302588   | -0.469   | 0.487     | 0.63 (0.24, 1.62)  | 0.335       |
| chr7:124914213:c:a  | <i>POT1</i>         | rs59294613  | -0.504   | 0.486     | 0.60 (0.23, 1.57)  | 0.300       |
| chr3:169796797:a:t  | <i>TERC</i>         | rs10936600  | -0.854   | 0.492     | 0.43 (0.16, 1.12)  | 0.082       |
| All - IVW           |                     |             | -0.385   | 0.483     | 0.68 (0.26, 1.75)  | 0.425       |

Supplemental Table S2. Sensitivity analysis for the MR analyses of genetically predicted telomere length on pediatric germ cell tumor

Leave one out analysis - Li et al 20 SNPs

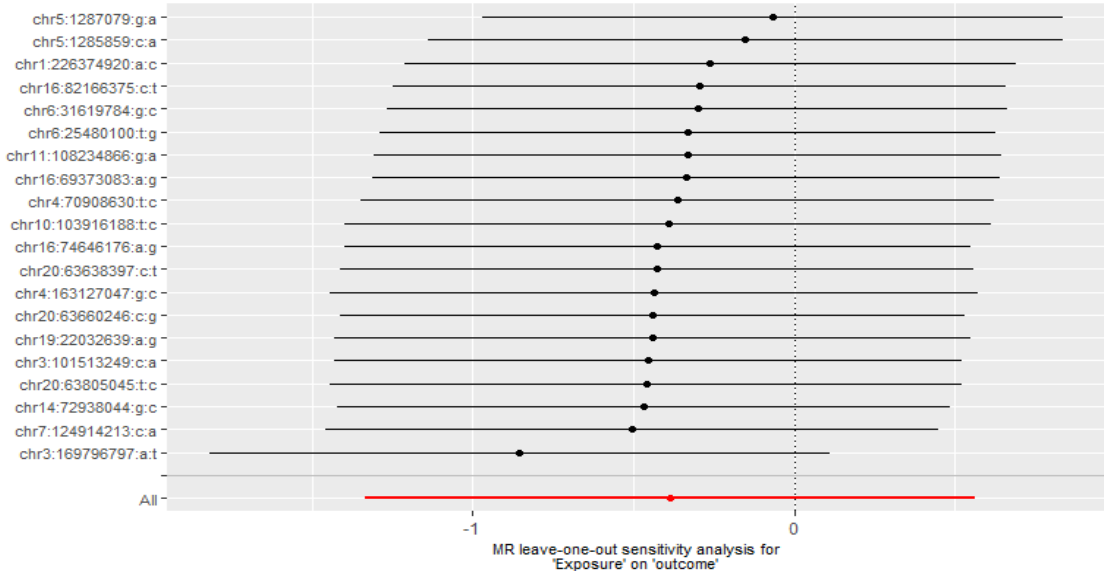

**Supplemental Table S2. Sensitivity analysis for the MR analyses of genetically predicted telomere length on pediatric germ cell tumor**

**Radial MR for Li et al 20 SNPs**

**IVW model**

|                         | <b>Estimate</b> | <b>Std.Error</b> | <b>Pr(&gt; t )</b> |
|-------------------------|-----------------|------------------|--------------------|
| <b>Effect (Mod.2nd)</b> | -0.386          | 0.483            | 0.425              |
| <b>Iterative</b>        | -0.386          | 0.483            | 0.425              |
| <b>Exact (FE)</b>       | -0.402          | 0.300            | 0.181              |
| <b>Exact (RE)</b>       | -0.392          | 0.571            | 0.501              |

**Residual standard error:** 1.609 on 19 degrees of freedom

**F-statistic:** 0.64 on 1 and 19 DF, p-value: 0.435

**Q-Statistic for heterogeneity:** 49.19581 on 19 DF , p-value: 0.000171947

**Outliers detected**

| <b>SNP</b>       | <b>rsID</b> | <b>Q_statistic</b> | <b>p.value</b> |
|------------------|-------------|--------------------|----------------|
| chr5:1287079:g:a | rs2853677   | 9.802              | 0.002          |

**Radial MR-Egger**

|             | <b>Estimate</b> | <b>Std. Error</b> | <b>Pr(&gt; t )</b> |
|-------------|-----------------|-------------------|--------------------|
| (Intercept) | -0.494          | 1.093             | 0.656              |
| Wj          | 0.239           | 1.467             | 0.872              |

**Residual standard error:** 1.645 on 18 degrees of freedom

**F-statistic:** 0.03 on 1 and 18 DF, p-value: 0.872

**Q-Statistic for heterogeneity:** 48.68264 on 18 DF , p-value: 0.0002042631

**Outliers detected**

| <b>SNP</b>       | <b>rsID</b> | <b>Q_statistic</b> | <b>p.value</b> |
|------------------|-------------|--------------------|----------------|
| chr5:1287079:g:a | rs2853677   | 10.736             | 0.001          |

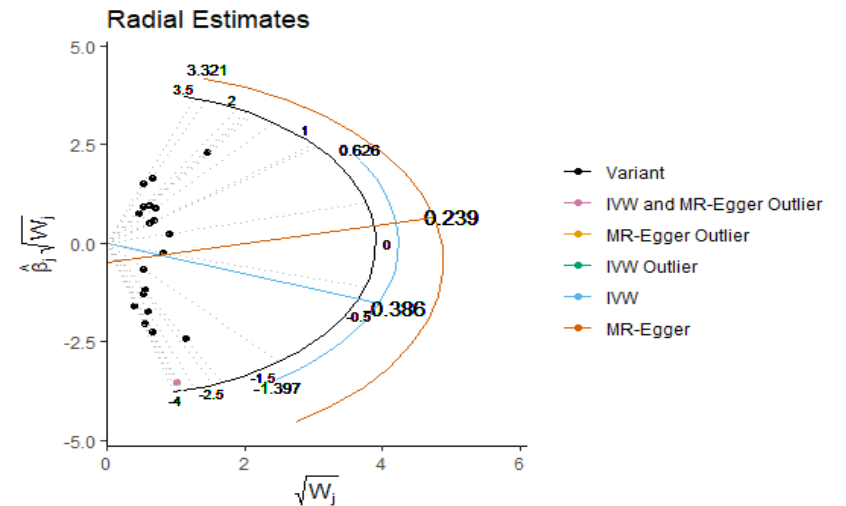

Pink dot indicates chr5:1287079:g:a (*TERT*/rs2853677) is the most influential variant in the IVW and MR Egger

**Supplemental Table S2. Sensitivity analysis for the MR analyses of genetically predicted telomere length on pediatric germ cell tumor**

*\*Remove TERT/rs2853677 SNP (chr5: 1287079:g:a) due to outlier indication - 19 SNPs total*

**MR Analysis - Li et al 19 SNPs (removing TERT/rs2853677 SNP [chr5: 1287079:g:a])**

| <b>SNP</b>                             | <b>Gene</b>         | <b>rsID</b> | <b>b</b>     | <b>se</b>   | <b>OR (95% CI)</b>       | <b>pval</b>  |
|----------------------------------------|---------------------|-------------|--------------|-------------|--------------------------|--------------|
| chr1:226374920:a:c                     | <i>PARP1</i>        | rs3219104   | -3.42        | 1.52        | 0.03 (0, 0.64)           | 0.024        |
| chr10:103916188:t:c                    | <i>STN1/OBFC1</i>   | rs9419958   | -0.29        | 1.21        | 0.75 (0.07, 7.94)        | 0.809        |
| chr11:108234866:g:a                    | <i>ATM</i>          | rs228595    | -2.33        | 1.84        | 0.10 (0, 3.59)           | 0.206        |
| chr14:72938044:g:c                     | <i>DCAF4</i>        | rs2302588   | 2.91         | 1.91        | 18.29 (0.44, 767.01)     | 0.127        |
| chr16:69373083:a:g                     | <i>TERF2</i>        | rs3785074   | -2.15        | 1.81        | 0.12 (0, 4.05)           | 0.235        |
| chr16:74646176:a:g                     | <i>RFWD3</i>        | rs62053580  | 1.64         | 2.14        | 5.17 (0.08, 342.06)      | 0.442        |
| chr16:82166375:c:t                     | <i>MPHOSPH6</i>     | rs7194734   | -3.72        | 1.84        | 0.02 (0, 0.89)           | 0.043        |
| chr19:22032639:a:g                     | <i>ZNF208</i>       | rs8105767   | 0.84         | 1.44        | 2.31 (0.14, 38.97)       | 0.561        |
| chr20:63638397:c:t                     | <i>RTEL1/STMN3</i>  | rs75691080  | 0.81         | 1.61        | 2.25 (0.1, 52.90)        | 0.616        |
| chr20:63660246:c:g                     | <i>RTEL1</i>        | rs34978822  | 1.79         | 1.90        | 5.97 (0.14, 248.48)      | 0.347        |
| chr20:63805045:t:c                     | <i>RTEL1/ZBTB46</i> | rs73624724  | 1.25         | 1.43        | 3.51 (0.21, 57.55)       | 0.379        |
| chr3:101513249:c:a                     | <i>SENP7</i>        | rs55749605  | 1.55         | 1.59        | 4.69 (0.21, 106.28)      | 0.331        |
| chr3:169796797:a:t                     | <i>TERC</i>         | rs10936600  | 1.58         | 0.68        | 4.88 (1.27, 18.68)       | 0.021        |
| chr4:163127047:g:c                     | <i>NAF1</i>         | rs4691895   | 0.27         | 1.10        | 1.31 (0.15, 11.42)       | 0.805        |
| chr4:70908630:t:c                      | <i>MOB1B</i>        | rs13137667  | -1.21        | 1.85        | 0.30 (0.01, 11.31)       | 0.514        |
| chr5:1285859:c:a                       | <i>TERT</i>         | rs7705526   | -2.13        | 0.87        | 0.12 (0.02, 0.66)        | 0.015        |
| chr6:25480100:t:g                      | <i>CARMIL1</i>      | rs34991172  | -3.88        | 2.43        | 0.02 (0, 2.43)           | 0.111        |
| chr6:31619784:g:c                      | <i>PRRC2A</i>       | rs2736176   | -2.90        | 1.67        | 0.06 (0, 1.45)           | 0.082        |
| chr7:124914213:c:a                     | <i>POT1</i>         | rs59294613  | 2.53         | 1.52        | 12.51 (0.64, 244.76)     | 0.096        |
| <b>All - Inverse variance weighted</b> |                     |             | <b>-0.07</b> | <b>0.46</b> | <b>0.94 (0.38, 2.31)</b> | <b>0.884</b> |
| <b>All - MR Egger</b>                  |                     |             | <b>1.28</b>  | <b>1.30</b> | <b>3.61 (0.28, 46.1)</b> | <b>0.338</b> |
| <b>All - Weighted median</b>           |                     |             | <b>0.72</b>  | <b>0.53</b> | <b>2.05 (0.73, 5.76)</b> | <b>0.176</b> |

Supplemental Table S2. Sensitivity analysis for the MR analyses of genetically predicted telomere length on pediatric germ cell tumor

MR Analysis - Li et al 19 SNPs (removing TERT/rs2853677 SNP [chr5: 1287079:g:a])

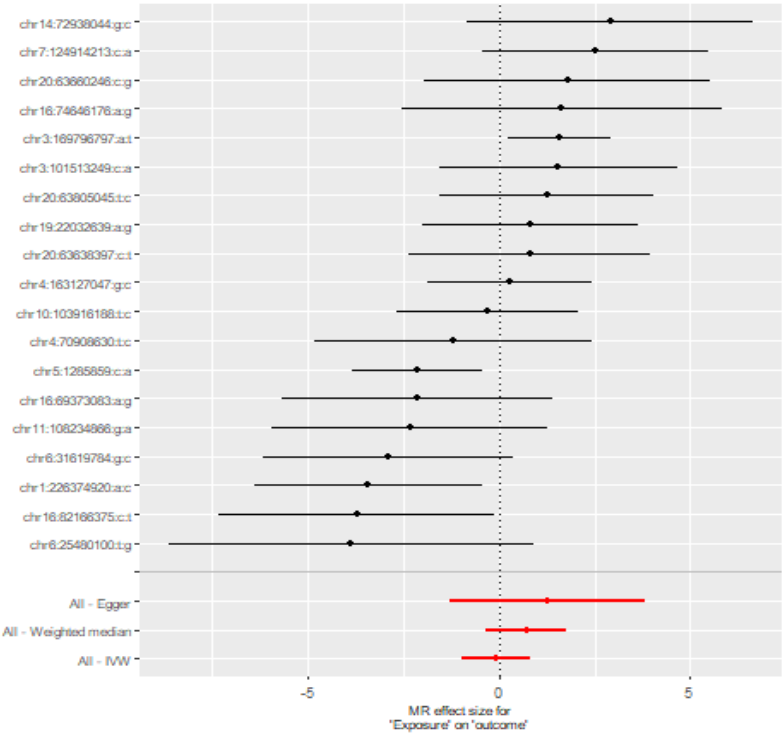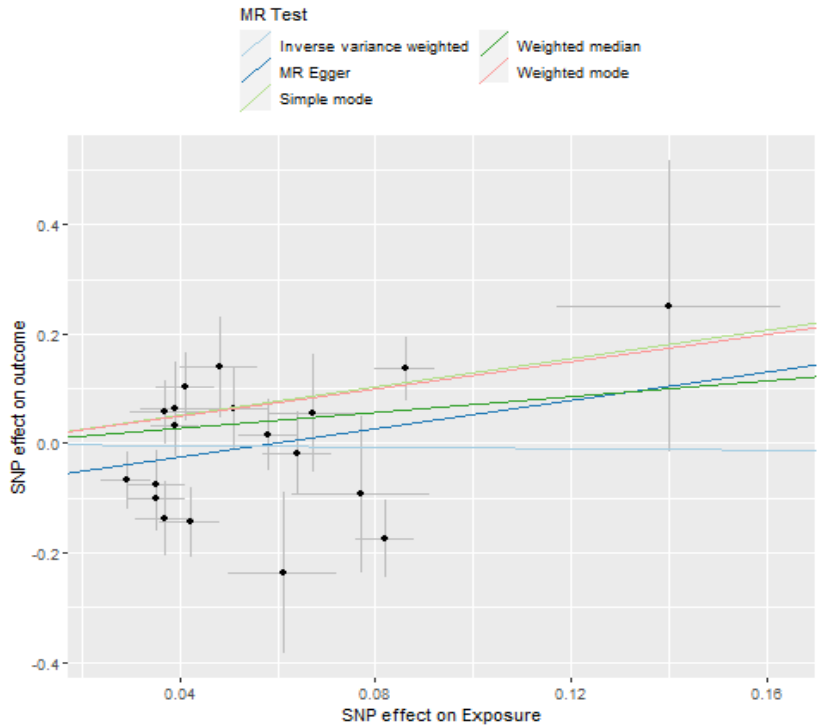

**Supplemental Table S2. Sensitivity analysis for the MR analyses of genetically predicted telomere length on pediatric germ cell tumor**

**Test for directional pleiotropy - Li et al. 19 SNPs (removing TERT/rs2853677 SNP [chr5: 1287079:g:a])**

|                                        | intercept | se    | pval  |
|----------------------------------------|-----------|-------|-------|
| MR Egger regression (test pleiotropy): | -0.075    | 0.067 | 0.283 |

**Test heterogeneity using Cochran's Q-statistic**

| method   | Q      | Q_df | Q_pval |
|----------|--------|------|--------|
| MR Egger | 35.831 | 17   | 0.0048 |
| IVW      | 38.425 | 18   | 0.0034 |

\*Significance suggests heterogeneity across SNPs

**Leave one out analysis - removes one variant and re-estimate causal effect using inverse variance weighted (IVW) method**

| SNP                 | Gene                | rsID       | b      | se    | OR (95% CI)       | pval  |
|---------------------|---------------------|------------|--------|-------|-------------------|-------|
| chr5:1285859:c:a    | <i>TERT</i>         | rs7705526  | 0.241  | 0.464 | 1.27 (0.51, 3.16) | 0.603 |
| chr1:226374920:a:c  | <i>PARP1</i>        | rs3219104  | 0.085  | 0.451 | 1.09 (0.45, 2.64) | 0.851 |
| chr16:82166375:c:t  | <i>MPHOSPH6</i>     | rs7194734  | 0.044  | 0.455 | 1.05 (0.43, 2.55) | 0.923 |
| chr6:31619784:g:c   | <i>PRRC2A</i>       | rs2736176  | 0.038  | 0.464 | 1.04 (0.42, 2.58) | 0.935 |
| chr6:25480100:t:g   | <i>CARMIL1</i>      | rs34991172 | -0.002 | 0.462 | 1.00 (0.40, 2.47) | 0.997 |
| chr11:108234866:g:a | <i>ATM</i>          | rs228595   | 0.001  | 0.471 | 1.00 (0.40, 2.52) | 0.998 |
| chr16:69373083:a:g  | <i>TERF2</i>        | rs3785074  | -0.002 | 0.473 | 1.00 (0.40, 2.52) | 0.997 |
| chr4:70908630:t:c   | <i>MOB1B</i>        | rs13137667 | -0.033 | 0.479 | 0.97 (0.38, 2.47) | 0.945 |
| chr10:103916188:t:c | <i>STN1/OBFC1</i>   | rs9419958  | -0.050 | 0.491 | 0.95 (0.36, 2.49) | 0.918 |
| chr16:74646176:a:g  | <i>RFWD3</i>        | rs62053580 | -0.105 | 0.475 | 0.90 (0.35, 2.29) | 0.825 |
| chr20:63638397:c:t  | <i>RTEL1/STMN3</i>  | rs75691080 | -0.102 | 0.481 | 0.90 (0.35, 2.32) | 0.833 |
| chr4:163127047:g:c  | <i>NAF1</i>         | rs4691895  | -0.097 | 0.494 | 0.91 (0.34, 2.39) | 0.844 |
| chr20:63660246:c:g  | <i>RTEL1</i>        | rs34978822 | -0.119 | 0.475 | 0.89 (0.35, 2.25) | 0.801 |
| chr19:22032639:a:g  | <i>ZNF208</i>       | rs8105767  | -0.112 | 0.483 | 0.89 (0.35, 2.30) | 0.816 |
| chr3:101513249:c:a  | <i>SENP7</i>        | rs55749605 | -0.133 | 0.477 | 0.88 (0.34, 2.23) | 0.781 |
| chr20:63805045:t:c  | <i>RTEL1/ZBTB46</i> | rs73624724 | -0.135 | 0.480 | 0.87 (0.34, 2.24) | 0.779 |
| chr14:72938044:g:c  | <i>DCAF4</i>        | rs2302588  | -0.151 | 0.465 | 0.86 (0.35, 2.14) | 0.746 |
| chr7:124914213:c:a  | <i>POT1</i>         | rs59294613 | -0.184 | 0.465 | 0.83 (0.33, 2.07) | 0.692 |
| chr3:169796797:a:t  | <i>TERC</i>         | rs10936600 | -0.511 | 0.480 | 0.60 (0.23, 1.54) | 0.287 |
| All - IVW           |                     |            | -0.067 | 0.461 | 0.94 (0.38, 2.31) | 0.884 |

Supplemental Table S2. Sensitivity analysis for the MR analyses of genetically predicted telomere length on pediatric germ cell tumor

Leave one out analysis - Li et al 19 SNPs (removing TERT/rs2853677 SNP [chr5: 1287079:g:a])

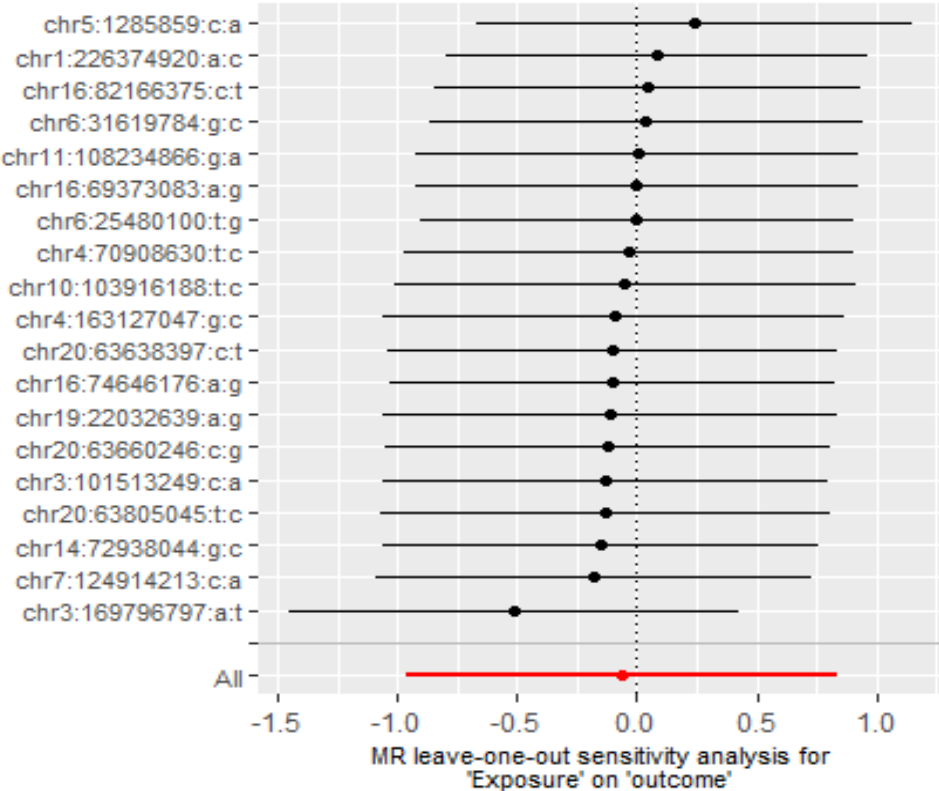



**Supplemental Table S2. Sensitivity analysis for the MR analyses of genetically predicted telomere length on pediatric germ cell tumor**

**Radial MR for Li et al 19 SNPs (removing *TERT*/rs2853677 SNP [chr5: 1287079:g:a])**

**IVW method**

|                  | <b>Estimate</b> | <b>Std.Error</b> | <b>Pr(&gt; t )</b> |
|------------------|-----------------|------------------|--------------------|
| Effect (Mod.2nd) | -0.067          | 0.461            | 0.884              |
| Iterative        | -0.067          | 0.461            | 0.884              |
| Exact (FE)       | -0.069          | 0.315            | 0.826              |
| Exact (RE)       | -0.068          | 0.531            | 0.900              |

**Residual standard error:** 1.461 on 18 degrees of freedom

**F-statistic:** 0.02 on 1 and 18 DF, p-value: 0.886

**Q-Statistic for heterogeneity:** 38.42319 on 18 DF , p-value: 0.003403432

**No significant outliers**

**Radial MR-Egger**

|             | <b>Estimate</b> | <b>Std. Error</b> | <b>Pr(&gt; t )</b> |
|-------------|-----------------|-------------------|--------------------|
| (Intercept) | -0.970          | 0.987             | 0.339              |
| Wj          | 1.195           | 1.366             | 0.394              |

**Residual standard error:** 1.453 on 17 degrees of freedom

**F-statistic:** 0.77 on 1 and 17 DF, p-value: 0.394

**Q-Statistic for heterogeneity:** 35.90944 on 17 DF , p-value: 0.007246888

**No significant outliers**

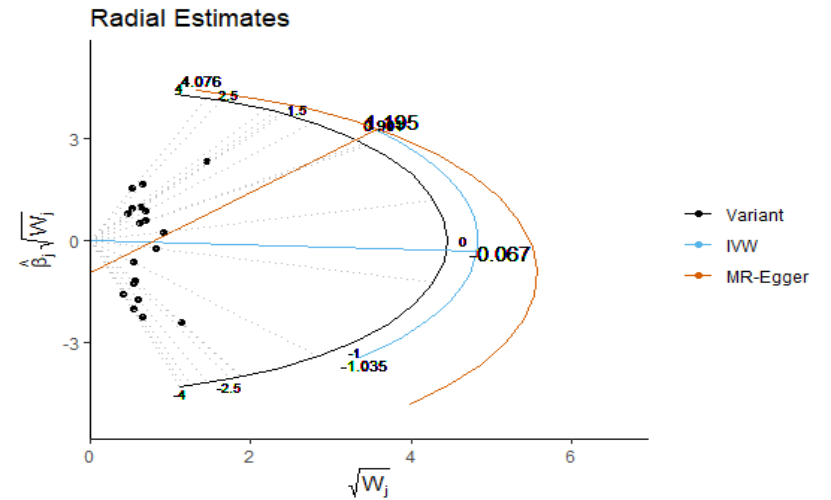

**Supplemental Table S2. Sensitivity analysis for the MR analyses of genetically predicted telomere length on pediatric germ cell tumor**

*\*Remove TERT/rs7705526 SNP (chr5:1285859:c:a) due to evidence of heterogeneity in both Radial IVW and Egger models and could suggest possible outlier - 18 SNPs total*

**Test for directional pleiotropy - Li et al. 18 SNPs (removing TERT/rs7705526 SNP (chr5:1285859:c:a))**

|                                               | intercept | se    | pval  |
|-----------------------------------------------|-----------|-------|-------|
| <b>MR Egger regression (test pleiotropy):</b> | -0.128    | 0.062 | 0.054 |

**Test heterogeneity using Cochran's Q-statistic**

| method   | Q      | Q_df | Q_pval |
|----------|--------|------|--------|
| MR Egger | 25.232 | 16   | 0.066  |
| IVW      | 32.038 | 17   | 0.015  |

**Leave one out analysis - removes one variant and re-estimate causal effect using inverse variance weighted (IVW) method**

| SNP                 | Gene                | rsID       | b      | se    | OR (95% CI)       | pval  |
|---------------------|---------------------|------------|--------|-------|-------------------|-------|
| chr1:226374920:a:c  | <i>PARP1</i>        | rs3219104  | 0.433  | 0.441 | 1.54 (0.65, 3.66) | 0.327 |
| chr16:82166375:c:t  | <i>MPHOSPH6</i>     | rs7194734  | 0.380  | 0.449 | 1.46 (0.61, 3.53) | 0.397 |
| chr6:31619784:g:c   | <i>PRRC2A</i>       | rs2736176  | 0.376  | 0.460 | 1.46 (0.59, 3.59) | 0.414 |
| chr6:25480100:t:g   | <i>CARMIL1</i>      | rs34991172 | 0.322  | 0.461 | 1.38 (0.56, 3.41) | 0.484 |
| chr11:108234866:g:a | <i>ATM</i>          | rs228595   | 0.331  | 0.471 | 1.39 (0.55, 3.50) | 0.482 |
| chr16:69373083:a:g  | <i>TERF2</i>        | rs3785074  | 0.328  | 0.473 | 1.39 (0.55, 3.51) | 0.489 |
| chr4:70908630:t:c   | <i>MOB1B</i>        | rs13137667 | 0.291  | 0.482 | 1.34 (0.52, 3.44) | 0.546 |
| chr10:103916188:t:c | <i>STN1/OBFC1</i>   | rs9419958  | 0.287  | 0.497 | 1.33 (0.50, 3.53) | 0.564 |
| chr16:74646176:a:g  | <i>RFWD3</i>        | rs62053580 | 0.205  | 0.481 | 1.23 (0.48, 3.15) | 0.67  |
| chr20:63638397:c:t  | <i>RTEL1/STMN3</i>  | rs75691080 | 0.215  | 0.488 | 1.24 (0.48, 3.23) | 0.66  |
| chr4:163127047:g:c  | <i>NAF1</i>         | rs4691895  | 0.238  | 0.503 | 1.27 (0.47, 3.40) | 0.636 |
| chr20:63660246:c:g  | <i>RTEL1</i>        | rs34978822 | 0.191  | 0.481 | 1.21 (0.47, 3.11) | 0.692 |
| chr19:22032639:a:g  | <i>ZNF208</i>       | rs8105767  | 0.206  | 0.491 | 1.23 (0.47, 3.22) | 0.674 |
| chr3:101513249:c:a  | <i>SENP7</i>        | rs55749605 | 0.180  | 0.484 | 1.20 (0.46, 3.09) | 0.711 |
| chr20:63805045:t:c  | <i>RTEL1/ZBTB46</i> | rs73624724 | 0.181  | 0.488 | 1.20 (0.46, 3.12) | 0.711 |
| chr14:72938044:g:c  | <i>DCAF4</i>        | rs2302588  | 0.155  | 0.471 | 1.17 (0.46, 2.94) | 0.742 |
| chr7:124914213:c:a  | <i>POT1</i>         | rs59294613 | 0.122  | 0.472 | 1.13 (0.45, 2.85) | 0.796 |
| chr3:169796797:a:t  | <i>TERC</i>         | rs10936600 | -0.192 | 0.505 | 0.83 (0.31, 2.22) | 0.704 |

Supplemental Table S2. Sensitivity analysis for the MR analyses of genetically predicted telomere length on pediatric germ cell tumor

Leave one out analysis - Li et al 18 SNPs (removing TERT/rs7705526 SNP [chr5:1285859:c:a])

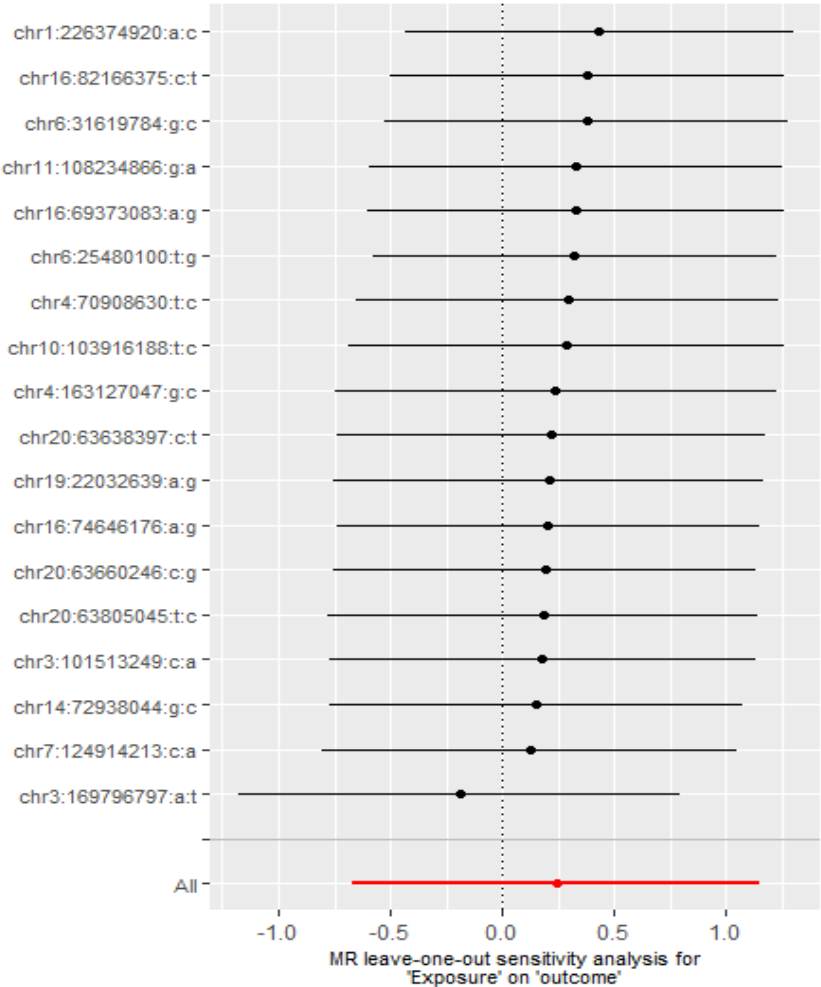

**Supplemental Table S2. Sensitivity analysis for the MR analyses of genetically predicted telomere length on pediatric germ cell tumor**

**Radial MR for Li et al 18 SNPs (removing TERT/rs7705526 SNP [chr5:1285859:c:a])**

**IVW method**

|                  | <b>Estimate</b> | <b>Std.Error</b> | <b>Pr(&gt; t )</b> |
|------------------|-----------------|------------------|--------------------|
| Effect (Mod.2nd) | 0.241           | 0.464            | 0.603              |
| Iterative        | 0.241           | 0.464            | 0.603              |
| Exact (FE)       | 0.249           | 0.338            | 0.461              |
| Exact (RE)       | 0.245           | 0.512            | 0.638              |

**Residual standard error:** 1.373 on 17 degrees of freedom

**F-statistic:** 0.27 on 1 and 17 DF, p-value: 0.61

**Q-Statistic for heterogeneity:** 32.03764 on 17 DF , p-value: 0.01488674

**No significant outliers**

**Radial MR-Egger**

|             | <b>Estimate</b> | <b>Std. Error</b> | <b>Pr(&gt; t )</b> |
|-------------|-----------------|-------------------|--------------------|
| (Intercept) | -1.752          | 0.900             | 0.069              |
| Wj          | 2.691           | 1.333             | 0.061              |

**Residual standard error:** 1.453 on 17 degrees of freedom

**F-statistic:** 4.08 on 1 and 16 DF, p-value: 0.0606

**Q-Statistic for heterogeneity:** 24.36702 on 16 DF , p-value: 0.1098009

**No significant outliers**

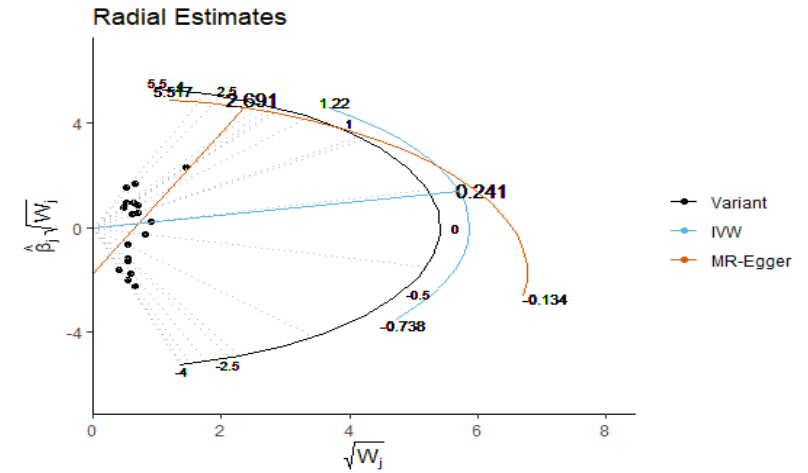

Supplement: 41416_2022_1798_MOESM2_ESM.pdf [file 41416_2022_1798_MOESM2_ESM.pdf]
