# Supplementary material
Source: PubMed Central journal article supplement (PMC9296514)
Supplement: 41416_2022_1798_MOESM1_ESM.pdf [file 41416_2022_1798_MOESM1_ESM.pdf]

Supplemental Table S1. Individual effect of leukocyte telomere length (LTL) related variants on germ cell tumor risk (GCT)

| SNP                                                        | Chr | Position (GRCh38) | Gene         | Rsq    | Typed/Imputed | L <sup>2</sup> allele | S <sup>3</sup> allele | Pediatric germ cell tumors (GCT) |        |       |                          |       |                          |                        |                                              |                        |                                 |           |         |        |       |                          |                   |           | UKB testicular GCT        |        |       |                          |                   |        |                        |        |        |                          |                   |       |
|------------------------------------------------------------|-----|-------------------|--------------|--------|---------------|-----------------------|-----------------------|----------------------------------|--------|-------|--------------------------|-------|--------------------------|------------------------|----------------------------------------------|------------------------|---------------------------------|-----------|---------|--------|-------|--------------------------|-------------------|-----------|---------------------------|--------|-------|--------------------------|-------------------|--------|------------------------|--------|--------|--------------------------|-------------------|-------|
|                                                            |     |                   |              |        |               |                       |                       | TDT (N = 610)                    |        |       |                          |       |                          |                        | Case-control analysis <sup>1</sup> (N = 803) |                        |                                 |           |         |        |       |                          |                   |           | Meta-analysis (N = 1,413) |        |       |                          |                   |        | Case-Control (N = 396) |        |        |                          |                   |       |
|                                                            |     |                   |              |        |               |                       |                       | LAF                              | beta   | se    | OR <sup>4</sup> (95% CI) | pval  | LAF for African ancestry | LAF for Asian ancestry | LAF for Hispanic ancestry                    | LAF for White ancestry | LAF for White non-trio ancestry | Direction | HetPval | beta   | se    | OR <sup>4</sup> (95% CI) | pval              | Direction | HetPval                   | beta   | se    | OR <sup>4</sup> (95% CI) | pval              | Rsq    | LAF                    | beta   | se     | OR <sup>3</sup> (95% CI) | pval              |       |
| <b>Codd et al. (2013) – 7 genetic variants predict LTL</b> |     |                   |              |        |               |                       |                       |                                  |        |       |                          |       |                          |                        |                                              |                        |                                 |           |         |        |       |                          |                   |           |                           |        |       |                          |                   |        |                        |        |        |                          |                   |       |
| rs11125529                                                 | 2   | 54248729          | ACYP2        | 0.9913 | IMPUTED       | A                     | C                     | 0.129                            | 0.023  | 0.122 | 1.02 (0.81, 1.30)        | 0.855 | 0.146                    | 0.128                  | 0.096                                        | 0.161                  | 0.145                           | ---       | 0.828   | 0.020  | 0.106 | 1.02 (0.83, 1.26)        | 0.853             | ----      | 0.914                     | 0.021  | 0.080 | 1.02 (0.87, 1.19)        | 0.793             | 0.9936 | 0.142                  | -0.088 | 0.125  | 0.92 (0.72, 1.17)        | 0.480             |       |
| rs10936599                                                 | 3   | 169774313         | TERC         | 1.0000 | TYPED         | C                     | T                     | 0.730                            | 0.109  | 0.092 | 1.12 (0.93, 1.34)        | 0.234 | 0.904                    | 0.419                  | 0.597                                        | 0.779                  | 0.749                           | ++++      | 0.779   | 0.155  | 0.076 | 1.17 (1.01, 1.36)        | 0.041             | ++++      | 0.864                     | 0.138  | 0.058 | 1.15 (1.02, 1.29)        | 0.018             | 1.0000 | 0.758                  | 0.093  | 0.093  | 1.10 (0.92, 1.32)        | 0.315             |       |
| rs7675998                                                  | 4   | 163086668         | NAF1         | 0.9008 | IMPUTED       | G                     | A                     | 0.780                            | 0.219  | 0.102 | 1.24 (1.02, 1.52)        | 0.033 | 0.830                    | 0.783                  | 0.768                                        | 0.747                  | 0.762                           | ---       | 0.201   | -0.060 | 0.087 | 0.94 (0.79, 1.12)        | 0.485             | ----      | 0.067                     | 0.056  | 0.066 | 1.06 (0.93, 1.20)        | 0.399             | 0.9972 | 0.781                  | -0.156 | 0.100  | 1.17 (0.96, 1.42)        | 0.118             |       |
| rs2736100*                                                 | 5   | 1286401           | TERT         | 0.9937 | TYPED         | C                     | A                     | 0.472                            | -0.130 | 0.082 | 0.88 (0.75, 1.03)        | 0.112 | 0.492                    | 0.473                  | 0.351                                        | 0.502                  | 0.464                           | ---       | 0.574   | -0.256 | 0.072 | 0.77 (0.67, 0.89)        | 0.0004            | ----      | 0.497                     | -0.198 | 0.054 | 0.82 (0.74, 0.91)        | 0.0003            | 1.0000 | 0.503                  | -0.183 | 0.078  | 0.83 (0.71, 0.97)        | 0.020             |       |
| rs9420907                                                  | 10  | 103916707         | OBFC1        | 0.9397 | IMPUTED       | C                     | A                     | 0.161                            | -0.113 | 0.112 | 0.89 (0.72, 1.11)        | 0.313 | 0.474                    | 0.063                  | 0.119                                        | 0.160                  | 0.152                           | +++       | 0.309   | 0.049  | 0.106 | 1.05 (0.85, 1.29)        | 0.645             | ++++      | 0.300                     | -0.033 | 0.077 | 0.97 (0.83, 1.13)        | 0.665             | 1.0000 | 0.139                  | -0.220 | 0.123  | 0.80 (0.63, 1.02)        | 0.073             |       |
| rs8105767†                                                 | 19  | 22032639          | ZNF208       | 0.9828 | IMPUTED       | G                     | A                     | 0.315                            | 0.053  | 0.087 | 1.05 (0.89, 1.25)        | 0.544 | 0.442                    | 0.288                  | 0.328                                        | 0.279                  | 0.308                           | ---       | 0.421   | 0.018  | 0.074 | 1.02 (0.88, 1.18)        | 0.804             | ----      | 0.555                     | 0.031  | 0.056 | 1.03 (0.92, 1.15)        | 0.580             | 0.9939 | 0.295                  | -0.032 | 0.087  | 1.03 (0.87, 1.22)        | 0.715             |       |
| rs755017                                                   | 20  | 63790269          | RTEL1        | 0.9996 | TYPED         | G                     | A                     | 0.144                            | 0.115  | 0.120 | 1.12 (0.89, 1.42)        | 0.337 | 0.279                    | 0.436                  | 0.197                                        | 0.131                  | 0.117                           | ---       | 0.375   | 0.059  | 0.089 | 1.06 (0.89, 1.26)        | 0.508             | ----      | 0.497                     | 0.079  | 0.072 | 1.08 (0.94, 1.25)        | 0.270             | 0.9993 | 0.138                  | -0.069 | 0.118  | 0.93 (0.74, 1.18)        | 0.560             |       |
| <b>Li et al. (2020) – 20 genetic variants predict LTL</b>  |     |                   |              |        |               |                       |                       |                                  |        |       |                          |       |                          |                        |                                              |                        |                                 |           |         |        |       |                          |                   |           |                           |        |       |                          |                   |        |                        |        |        |                          |                   |       |
| rs3219104                                                  | 1   | 226374920         | PARP1        | 0.9384 | IMPUTED       | C                     | A                     | 0.779                            | -0.057 | 0.102 | 0.94 (0.77, 1.15)        | 0.575 | 0.857                    | 0.569                  | 0.646                                        | 0.807                  | 0.805                           | ---       | 0.748   | -0.199 | 0.082 | 0.82 (0.70, 0.96)        | 0.015             | ----      | 0.682                     | -0.144 | 0.064 | 0.87 (0.76, 0.98)        | 0.024             | 0.9960 | 0.847                  | -0.060 | 0.106  | 0.94 (0.76, 1.16)        | 0.570             |       |
| rs55749605                                                 | 3   | 101513249         | SENP7        | 0.9886 | IMPUTED       | C                     | A                     | 0.334                            | 0.092  | 0.088 | 1.10 (0.92, 1.30)        | 0.294 | 0.231                    | 0.399                  | 0.218                                        | 0.387                  | 0.391                           | ++++      | 0.744   | 0.029  | 0.079 | 1.03 (0.88, 1.20)        | 0.716             | ++++      | 0.816                     | 0.057  | 0.059 | 1.06 (0.94, 1.19)        | 0.331             | 0.9981 | 0.375                  | 0.109  | 0.082  | 0.90 (0.76, 1.05)        | 0.183             |       |
| rs10936600                                                 | 3   | 169796797         | TERC         | 0.9842 | IMPUTED       | A                     | T                     | 0.729                            | 0.101  | 0.092 | 1.11 (0.92, 1.32)        | 0.272 | 0.895                    | 0.438                  | 0.602                                        | 0.778                  | 0.756                           | ++++      | 0.367   | 0.162  | 0.077 | 1.18 (1.01, 1.37)        | 0.036             | ++++      | 0.472                     | 0.136  | 0.059 | 1.15 (1.02, 1.29)        | 0.021             | 0.9988 | 0.757                  | -0.100 | 0.093  | 0.90 (0.75, 1.09)        | 0.282             |       |
| rs13137667                                                 | 4   | 70908630          | MOB1B        | 0.5887 | IMPUTED       | C                     | T                     | 0.963                            | 0.169  | 0.220 | 1.18 (0.77, 1.82)        | 0.442 | 0.762                    | 0.945                  | 0.940                                        | 0.950                  | 0.947                           | ---       | 0.547   | -0.283 | 0.188 | 0.75 (0.52, 1.09)        | 0.131             | ----      | 0.357                     | -0.093 | 0.143 | 0.91 (0.69, 1.21)        | 0.515             | 0.9928 | 0.969                  | -0.110 | 0.268  | 0.90 (0.53, 1.52)        | 0.683             |       |
| rs4691895                                                  | 4   | 163127047         | NAF1         | 1.0000 | TYPED         | C                     | G                     | 0.774                            | 0.208  | 0.100 | 1.23 (1.01, 1.50)        | 0.037 | 0.853                    | 0.786                  | 0.783                                        | 0.757                  | 0.787                           | ---       | 0.251   | -0.119 | 0.084 | 0.89 (0.75, 1.05)        | 0.155             | ----      | 0.040                     | 0.016  | 0.064 | 1.02 (0.90, 1.15)        | 0.806             | 0.9967 | 0.775                  | -0.110 | 0.098  | 1.12 (0.92, 1.35)        | 0.263             |       |
| rs7705526*                                                 | 5   | 1285859           | TERT         | 0.8314 | IMPUTED       | A                     | C                     | 0.265                            | -0.211 | 0.123 | 0.81 (0.64, 1.03)        | 0.086 | 0.189                    | 0.335                  | 0.229                                        | 0.320                  | 0.295                           | ---       | 0.111   | -0.156 | 0.088 | 0.86 (0.72, 1.02)        | 0.077             | ----      | 0.177                     | -0.175 | 0.072 | 0.84 (0.73, 0.97)        | 0.015             | 0.9705 | 0.326                  | -0.201 | 0.089  | 0.82 (0.69, 0.97)        | 0.024             |       |
| rs2853677*                                                 | 5   | 1287079           | TERT         | 0.8534 | IMPUTED       | G                     | A                     | 0.390                            | -0.159 | 0.098 | 0.85 (0.70, 1.03)        | 0.105 | 0.326                    | 0.460                  | 0.302                                        | 0.432                  | 0.417                           | ---       | 0.975   | -0.263 | 0.081 | 0.77 (0.66, 0.90)        | 0.001             | ----      | 0.950                     | -0.221 | 0.063 | 0.80 (0.71, 0.91)        | <0.001            | 1.0000 | 0.424                  | -0.225 | 0.083  | 0.80 (0.68, 0.94)        | 0.007             |       |
| rs34991172                                                 | 6   | 25480100          | CARMIL1      | 0.9762 | IMPUTED       | T                     | G                     | 0.960                            | -0.423 | 0.209 | 0.66 (0.44, 0.99)        | 0.041 | 0.991                    | 0.999                  | 0.986                                        | 0.932                  | 0.939                           | ??-+      | 0.311   | -0.047 | 0.211 | 0.95 (0.63, 1.44)        | 0.826             | ??-+      | 0.268                     | -0.237 | 0.148 | 0.79 (0.59, 1.06)        | 0.111             | 0.9823 | 0.920                  | -0.146 | 0.168  | 1.16 (0.83, 1.61)        | 0.384             |       |
| rs2736176                                                  | 6   | 31619784          | PRRC2A       | 1.0000 | TYPED         | C                     | G                     | 0.319                            | -0.121 | 0.090 | 0.89 (0.74, 1.06)        | 0.179 | 0.074                    | 0.308                  | 0.344                                        | 0.308                  | 0.305                           | ---       | 0.139   | -0.087 | 0.077 | 0.92 (0.79, 1.07)        | 0.256             | ----      | 0.220                     | -0.102 | 0.058 | 0.90 (0.81, 1.01)        | 0.082             | 1.0000 | 0.282                  | 0.075  | 0.086  | 1.06 (0.91, 1.28)        | 0.386             |       |
| rs59294613                                                 | 7   | 124914213         | POT1         | 0.9883 | IMPUTED       | C                     | A                     | 0.713                            | 0.004  | 0.093 | 1.00 (0.84, 1.21)        | 0.963 | 0.724                    | 0.682                  | 0.771                                        | 0.738                  | 0.713                           | ---       | 0.139   | 0.184  | 0.084 | 1.20 (1.02, 1.42)        | 0.028             | ++++      | 0.109                     | 0.104  | 0.062 | 1.11 (0.98, 1.25)        | 0.096             | 0.9998 | 0.713                  | 0.073  | 0.089  | 0.93 (0.78, 1.11)        | 0.411             |       |
| rs9419958                                                  | 10  | 103916188         | STN1 (OBFC1) | 0.9393 | IMPUTED       | T                     | C                     | 0.161                            | -0.107 | 0.113 | 0.90 (0.72, 1.12)        | 0.340 | 0.474                    | 0.063                  | 0.117                                        | 0.160                  | 0.152                           | +++       | 0.332   | 0.060  | 0.106 | 1.06 (0.86, 1.31)        | 0.571             | ++++      | 0.330                     | -0.019 | 0.077 | 0.98 (0.84, 1.14)        | 0.809             | 0.9882 | 0.139                  | -0.213 | 0.123  | 1.24 (0.97, 1.57)        | 0.082             |       |
| rs228595                                                   | 11  | 108234866         | ATM          | 0.9791 | IMPUTED       | G                     | A                     | 0.555                            | -0.099 | 0.082 | 0.91 (0.77, 1.06)        | 0.232 | 0.753                    | 0.634                  | 0.465                                        | 0.553                  | 0.605                           | +++       | 0.842   | -0.045 | 0.070 | 0.96 (0.83, 1.10)        | 0.522             | ++++      | 0.894                     | -0.068 | 0.053 | 0.93 (0.84, 1.04)        | 0.206             | 0.9883 | 0.591                  | 0.117  | 0.081  | 0.89 (0.76, 1.04)        | 0.149             |       |
| rs2302588                                                  | 14  | 72938044          | DCAF4        | 0.9839 | IMPUTED       | C                     | G                     | 0.100                            | 0.086  | 0.139 | 1.09 (0.83, 1.43)        | 0.534 | 0.066                    | 0.215                  | 0.090                                        | 0.099                  | 0.090                           | 0.090     | ++++    | 0.943  | 0.181 | 0.122                    | 1.20 (0.94, 1.52) | 0.138     | 0++++                     | 0.960  | 0.140 | 0.092                    | 1.15 (0.96, 1.38) | 0.127  | 1.0000                 | 0.101  | -0.116 | 0.133                    | 0.89 (0.69, 1.15) | 0.382 |
| rs785074                                                   | 16  | 69373083          | TERF2        | 0.9802 | IMPUTED       | G                     | A                     | 0.254                            | -0.079 | 0.093 | 0.92 (0.77, 1.11)        | 0.400 | 0.442                    | 0.106                  | 0.199                                        | 0.283                  | 0.264                           | ---       | 0.534   | -0.072 | 0.086 | 0.93 (0.79, 1.10)        | 0.402             | ----      | 0.678                     | -0.075 | 0.063 | 0.93 (0.82, 1.05)        | 0.235             | 0.9990 | 0.290                  | -0.269 | 0.093  | 0.76 (0.64, 0.92)        | 0.004             |       |
| rs62053580                                                 | 16  | 74646176          | RFWD3        | 0.9229 | IMPUTED       | A                     | G                     | 0.868                            | -0.026 | 0.130 | 0.97 (0.76, 1.26)        | 0.846 | 0.920                    | 0.757                  | 0.898                                        | 0.846                  | 0.825                           | ---       | 0.773   | 0.127  | 0.109 | 1.14 (0.92, 1.41)        | 0.243             | ++++      | 0.760                     | 0.064  | 0.083 | 1.07 (0.91, 1.26)        | 0.442             | 0.9890 | 0.834                  | 0.069  | 0.111  | 0.93 (0.75, 1.16)        | 0.530             |       |
| rs7194734                                                  | 16  | 82166375          | MPHOSPH6     | 0.8880 | IMPUTED       | C                     | T                     | 0.205                            | -0.239 | 0.101 | 0.79 (0.65, 0.96)        | 0.018 | 0.215                    | 0.242                  | 0.191                                        | 0.236                  | 0.235                           | ----      | 0.399   | -0.055 | 0.091 | 0.95 (0.79, 1.13)        | 0.548             | ++++      | 0.319                     | -0.138 | 0.068 | 0.87 (0.76, 1.00)        | 0.043             | 0.9997 | 0.228                  | 0.035  | 0.092  | 0.97 (0.81, 1.16)        | 0.706             |       |
| rs8105767†                                                 | 19  | 22032639          | ZNF208       | 0.9828 | IMPUTED       | G                     | A                     | 0.315                            | 0.053  | 0.087 | 1.05 (0.89, 1.25)        | 0.544 | 0.442                    | 0.288                  | 0.328                                        | 0.279                  | 0.308                           | ---       | 0.421   | 0.018  | 0.074 | 1.02 (0.88, 1.18)        | 0.804             | ----      | 0.552                     | 0.033  | 0.056 | 1.03 (0.93, 1.15)        | 0.560             | 0.9939 | 0.295                  | 0.032  | 0.087  | 1.03 (0.87, 1.22)        | 0.715             |       |
| rs75691080                                                 | 20  | 63638397          | RTEL1/STMN3  | 0.9180 | IMPUTED       | C                     | T                     | 0.923                            | 0.037  | 0.157 | 1.04 (0.76, 1.41)        | 0.814 | 0.921                    | 0.987                  | 0.939                                        | 0.918                  | 0.928                           | ---       | 0.930   | 0.070  | 0.149 | 1.07 (0.80, 1.44)        | 0.639             | ++++      | 0.971                     | 0.054  | 0.108 | 1.06 (0.85, 1.30)        | 0.616             | 0.9851 | 0.915                  | -0.267 | 0.134  | 1.31 (1.00, 1.70)        | 0.046             |       |
| rs34978822                                                 | 20  | 63660246          | RTEL1        | 0.8866 | IMPUTED       | C                     | G                     | 0.989                            | 0.693  | 0.408 | 2.00 (0.90, 4.45)        | 0.083 | 0.971                    | 0.992                  | 0.989                                        | 0.981                  | 0.982                           | +++       | 0.124   | -0.078 | 0.351 | 0.92 (0.46, 1.84)        | 0.825             | ++++      | 0.099                     | 0.250  | 0.266 | 1.28 (0.76, 2.16)        | 0.348             | 0.9912 | 0.979                  | -0.262 | 0.260  | 1.30 (0.78, 2.16)        | 0.315             |       |
| rs73624724                                                 | 20  | 63805045          | RTEL1/ZBTB46 | 0.9771 | IMPUTED       | C                     | T                     | 0.143                            | 0.095  | 0.121 | 1.10 (0.87, 1.39)        | 0.431 | 0.255                    | 0.423                  | 0.190                                        | 0.131                  | 0.122                           | ---       | 0.414   | 0.046  | 0.091 | 1.05 (0.88, 1.25)        | 0.611             | ----      | 0.542                     | 0.064  | 0.073 | 1.07 (0.92, 1.23)        | 0.379             | 0.9998 | 0.142                  | -0.033 | 0.115  | 0.97 (0.77, 1.21)        | 0.775             |       |

<sup>1</sup> Model adjusted for ancestry-specific PCs (2 PCs for European Ancestry, 3 PCs for Hispanic and Asian Ancestry, and 4 PCs for African Ancestry), sex (male and female), and study site (COG, Michigan, or California);

<sup>2</sup> L allele = allele associated with longer leukocyte telomere length;

<sup>3</sup>
