# Supplementary material
Source: PubMed Central journal article supplement (PMC9296514)

**Supplemental Table S3 - Linkage relationship of *TERT* variants in previously reported loci. LD**

( $r^2$  and  $D'$ ) were calculated using LD Link (<https://ldlink.nci.nih.gov>).

LD is calculated for both All Populations and Europeans (CEU) based on 1000 genomes information.

**All Populations**

|           | rs2736100                 | rs7705526                 | rs2853677                 | rs4635969 |
|-----------|---------------------------|---------------------------|---------------------------|-----------|
| rs2736100 | 1                         |                           |                           |           |
| rs7705526 | $D' = 0.806; r^2 = 0.437$ | 1                         |                           |           |
| rs2853677 | $D' = 0.990; r^2 = 0.494$ | $D' = 0.656; r^2 = 0.322$ | 1                         |           |
| rs4635969 | $D' = 0.373; r^2 = 0.030$ | $D' = 0.519; r^2 = 0.029$ | $D' = 0.595; r^2 = 0.051$ | 1         |

**All European**

|           | rs2736100                 | rs7705526                 | rs2853677                 | rs4635969 |
|-----------|---------------------------|---------------------------|---------------------------|-----------|
| rs2736100 | 1                         |                           |                           |           |
| rs7705526 | $D' = 0.356; r^2 = 0.015$ | 1                         |                           |           |
| rs2853677 | $D' = 0.784; r^2 = 0.435$ | $D' = 0.507; r^2 = 0.185$ | 1                         |           |
| rs4635969 | $D' = 0.279; r^2 = 0.018$ | $D' = 0.356; r^2 = 0.015$ | $D' = 0.616; r^2 = 0.062$ | 1         |

SNPs associated with:

testicular germ cell tumors - rs2736100 (Turnbull 2010; Litchfield 2017; Wang 2017) and rs4635969 (Turnbull 2010; Ruarck 2013; Wang 2017).

telomere length - rs2736100 (Codd 2013), rs7705526 (Li 2020), and rs2853677 (Li 2020).

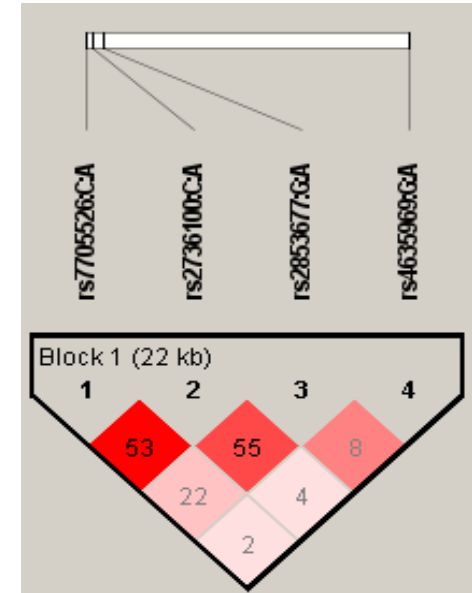

Supplement: 41416_2022_1798_MOESM3_ESM.pdf [file 41416_2022_1798_MOESM3_ESM.pdf]
